# Supplementary material for: Plasmodium infection and its risk factors in eastern Uganda
Source: Springer Nature journal article supplement (doi:10.1186/1475-2875-9-2), 2010-01-04
Supplement: Additional file 1 [file 1475-2875-9-2-s1.doc]

| **Additional Table 1 Bivariate logistic regression models for *Plasmodium* prevalence for the whole community, and stratified by age group.** | | | | | | | | | | | | | | | | |
| --- | --- | --- | --- | --- | --- | --- | --- | --- | --- | --- | --- | --- | --- | --- | --- | --- |
|  | Whole Community (all ages) | | | | Under 5 years | | | | School-aged children (5-15 years) | | | | Adults (16 + years) | | | |
| **Explanatory variable** | *N* | OR | 95% CI | *P* | *N* | OR | 95% CI | *P* | *N* | OR | 95% CI | *P* | *N* | OR | 95% CI | *P* |
| **Demographic factors**  Sex:  Female  Male | *1010*  *834* | 1  **1.46** | -  (1.21-1.76) | -  <0.001 | *207*  *190* | 1.00  1.43 | -  (0.96-2.13) | -  0.08 | *316*  *351* | 1  1.08 | -  (0.79-1.48) | -  0.6 | *494*  *310* | 1  1.29 | -  (0.90-1.67) | -  0.2 |
| Age:  <2 years  3-4 years  5-9 years  10-15 years  16-25 years  26-49 years  50 + years | *2113*  *184*  *340*  *303*  *209*  *367*  *228* | 1  **1.73**  **2.79**  **2.15**  **0.59**  **0.32**  **0.18** | -  (1.17-2.56)  (1.98-3.94)  (1.52-3.05)  (0.39-0.88)  (0.22-0.47)  (0.11-0.29) | -  0.006  <0.001  <0.001  0.01  <0.001  <0.001 | *213*  *184* | 1.00  **1.74** | -  (1.17-2.60) | -  0.007 | *340*  *303* | 1  1.27 | -  (0.93-1.75) | -  0.2 | *209*  *367*  *228* | 1  **3.27**  **1.85** | -  (1.92-5.53)  (1.11-3.07) | -  <0.001  0.02 |
| **Bednets Use**  Slept under a net last night?  No  Yes  More than 1 net / 2 ppl  No  Yes  Ever-treated nets in hhold  No  Yes | *1128*  *716*  *1698*  *140*  *1189*  *651* | 1  **0.61**  1  **0.56**  1  1.09 | -  (0.50-0.74)  -  (0.38-0.83)  -  (0.90-1.3) | -  <0.001  -  0.004  -  0.4 | *207*  *190*  *378*  *19*  *253*  *144* | 1  **0.68**  1  **0.22**  1  **0.64** | -  (0.46-1.10)  -  (0.06-0.78)  -  (0.42-0.97) | -  0.06  -  0.02  -  0.04 | *495*  *172*  *625*  *42*  *431*  *236* | 1  **0.62**  1  0.85  1  1.20 | -  (0.44-0.88)  -  (0.45-1.61)  -  (0.86-1.67) | -  0.008  -  0.6  -  0.3 | *540*  *354*  *725*  *79*  *533*  *271* | 1  0.92  1  0.73  1  1.20 | -  (0.63-1.32)  -  (0.34-1.42)  -  (0.82-1.76) | -  0.6  -  0.4  -  0.3 |
| **Household characteristics**  Relative SES (quintiles)  Poorest  Poor  Median  Less poor  Least poor | *318*  *367*  *350*  *398*  *411* | 1  0.89  1.01  1.24  0.85 | -  (0.65-1.21)  (0.74-1.38)  (0.92-1.68)  (0.70-1.28) | -  0.4  0.9  0.2  0.7 | *75*  *90*  *85*  *75*  *72* | 1  1.42  0.81  1.81  0.85 | -  (0.76-2.63)  (0.43-1.54)  (0.95-3.45)  (0.44-1.65) | -  0.3  0.5  0.07  0.6 | *104*  *107*  *118*  *155*  *159* | 1  **0.58**  0.74  0.83  0.83 | -  (0.33-1.01)  (0.43-1.28)  (0.49-1.39)  (0.50-1.40) | -  0.05  0.3  0.5  0.5 | *139*  *170*  *147*  *168*  *180* | 1  1.00  1.60  1.30  0.90 | -  (0.54-1.85)  (0.88-2.90)  (0.72-2.25)  (0.48-1.66) | -  0.99  0.1  0.4  0.7 |
| Residents (linear 1-10+) |  | **1.18** | (1.13-1.24) | <0.001 |  | 1.06 | (0.97-1.17) | 0.2 |  | 1.06 | (0.99-1.15) | 0.1 |  | 1.05 | (0.98-1.13) | 0.1 |
| Latrine  None / uncovered pit  Covered pit | *1472*  *372* | 1  0.92 | -  (0.72-1.16) | -  0.5 | *316*  *81* | 1  0.78 | -  (0.47-1.28) | -  0.3 | *511*  *132* | 1  **0.69** | -  (0.47-1.02) | -  0.07 | *645*  *152* | 1  1.35 | -  (0.88-2.08) | -  0.2 |
| **Location characteristics**  Distance from health centre  <1000m  >1000m | *525*  *1278* | 1  **1.13** | -  (1.02-1.26) | -  0.02 | *1044*  *282* | 1  1.06 | -  (0.84-1.33) | -  0.6 | *197*  *432* | 1  1.13 | -  (0.96-1.35) | -  0.1 | *224*  *564* | 1  **1.44** | -  (1.14-1.81) | -  0.002 |
| Distance - open spring / well  < 250m  > 250m | *102*  *1696* | 1  **0.58** | -  (0.37-0.88) | -  0.01 | *25*  *372* | 1  0.56 | -  (0.22-1.43) | -  0.2 | *42*  *586* | 1  **0.53** | -  (0.26-1.08) | -  0.08 | *41*  *738* | 1  1.25 | -  (0.51-3.03) | -  0.6 |
| Distance - rice paddies  <750m  >750m | *382*  *1462* | 1  **0.70** | -  (0.55-0.88) | -  0.002 | *82*  *315* | 1  0.75 | -  (0.46-0.12) | -  0.3 | *128*  *515* | 1  0.81 | -  (0.54-1.21) | -  0.3 | *172*  *632* | -  **0.49** | -  (0.33-0.73) | -  <0.001 |
| Distance - rocky area  <500m  >500m | *1026*  *818* | 1  **1.34** | -  (1.11-1.62) | -  0.002 | *215*  *182* | 1  **1.73** | -  (1.16-2.59) | -  0.007 | *357*  *286* | 1  1.21 | -  (0.88-1.66) | -  0.3 | *454*  *350* | 1  1.37 | -  (0.95-1.97) | -  0.09 |
| Village:  Mulanda Store  Koribudi A  Koribudi B  Mulanda Ayago | *519*  *392*  *563*  *370* | 1  1.00  0.89  0.88 | -  (0.74-1.34)  (0.68-1.17)  (0.64-1.20) | -  1.0  0.4  0.4 | *106*  *82*  *129*  *80* | 1  1.29  0.89  1.36 | -  (0.73-2.30)  (0.53-1.49)  (0.76-2.43) | -  0.4  0.7  0.3 | *186*  *123*  *196*  *138* | 1  1.21  0.80  0.86 | -  (0.75-1.95)  (0.53-1.21)  (0.54-1.35) | -  0.4  0.3  0.5 | *227*  *187*  *238*  *152* | 1  **1.74**  1.21  0.78 | -  (1.06-2.84)  (0.74-1.97)  (0.43-1.34) | -  0.03  0.4  0.4`` |
| Nb. Variables significant at the 10% significance level (ORs shown in bold) were subsequently entered into Bayesian multivariate logistic regression models using a process of backwards-stepwise elimination. | | | | | | | | | | | | | | | | |
